# Supplementary material for: Repeated Dose 28-Days Oral Toxicity Study of Carica papaya L. Leaf Extract in Sprague Dawley Rats
Source: Molecules. 2012 Apr 10;17(4):4326–42. doi: 10.3390/molecules17044326 (PMC6268730; doi:10.3390/molecules17044326)

## Supplementary

### Repeated Dose 28-Days Oral Toxicity Study of *Carica papaya* L. Leaf Extract in Sprague Dawley Rats

**Figure 1.** Histological structure of liver from female SD rat from control group showing the Central vein (CV), hepatic vein (HV), the sinusoid and the hepatocytes are normal.  $\times 40$  (H&E Staining).

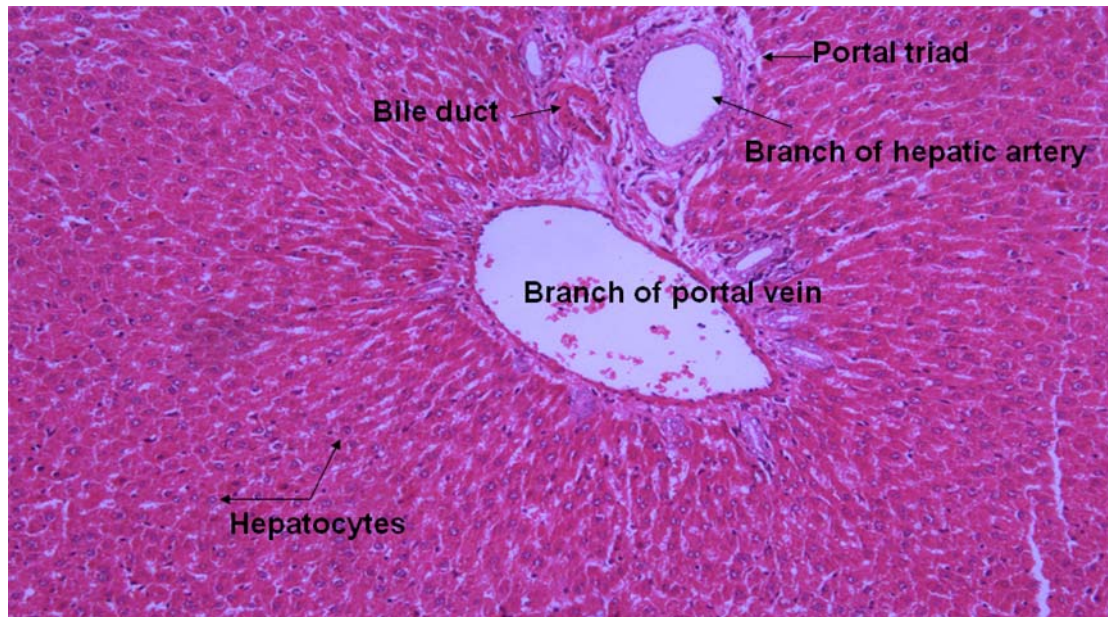

**Figure 2.** Histological structure of liver from female SD rat from Medium Dose group showing the Central vein (CV), hepatic vein (HV) and the sinusoid. The sinusoid and the hepatocytes were normal as compared to the control.  $\times 20$  (H&E Staining)

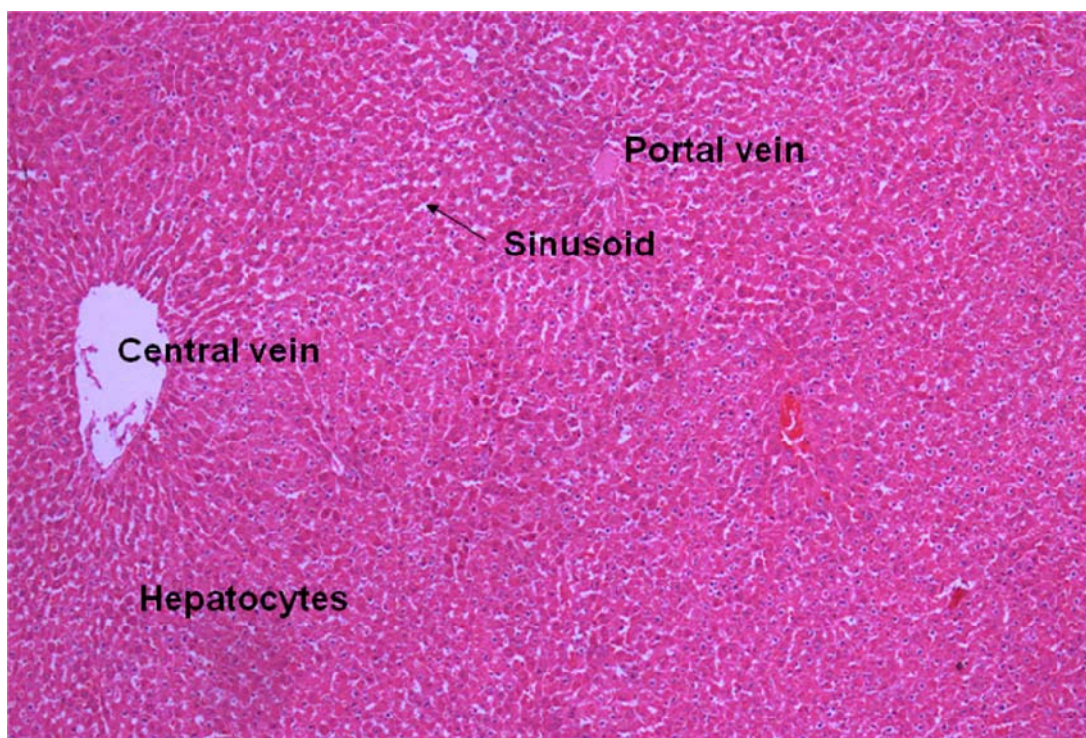

**Figure 3.** Histological structure of liver from female SD rat from High Dose group showing the Central vein (CV), hepatic vein (HV) and the sinusoid and the hepatocytes. The sinusoid were normal as compared to the control. (H&E Staining)  $\times 20$

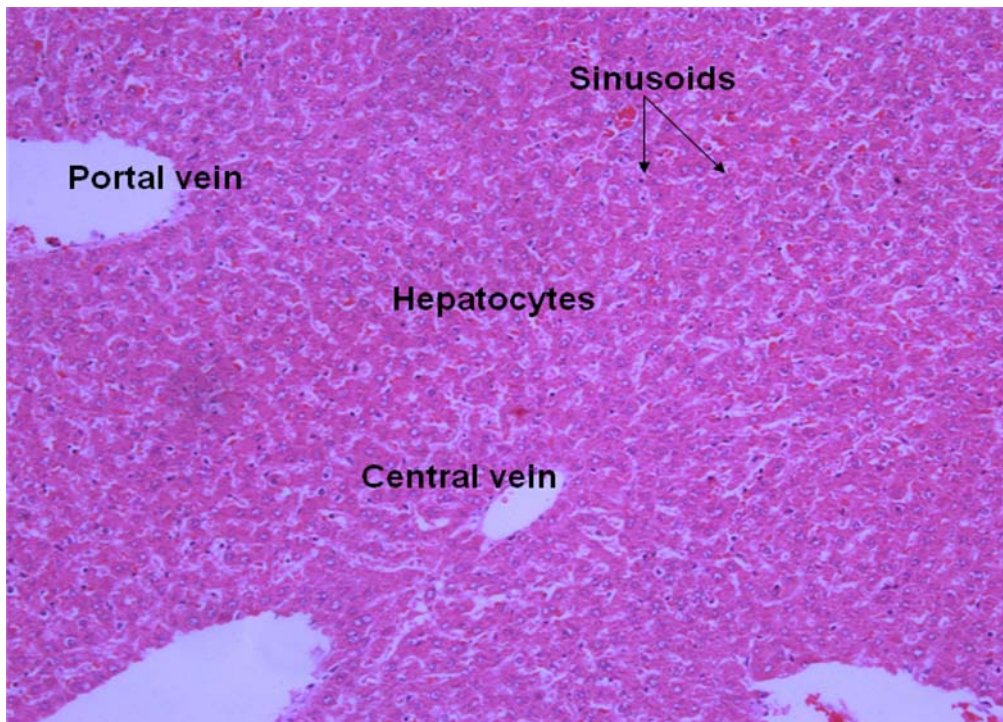

**Figure 4.** Histological structure of liver from female SD rat from High Dose group showing the Central vein (CV), hepatic vein (HV) and the sinusoid and the hepatocytes were normal as compared to the control.  $\times 20$ (H&E Staining)

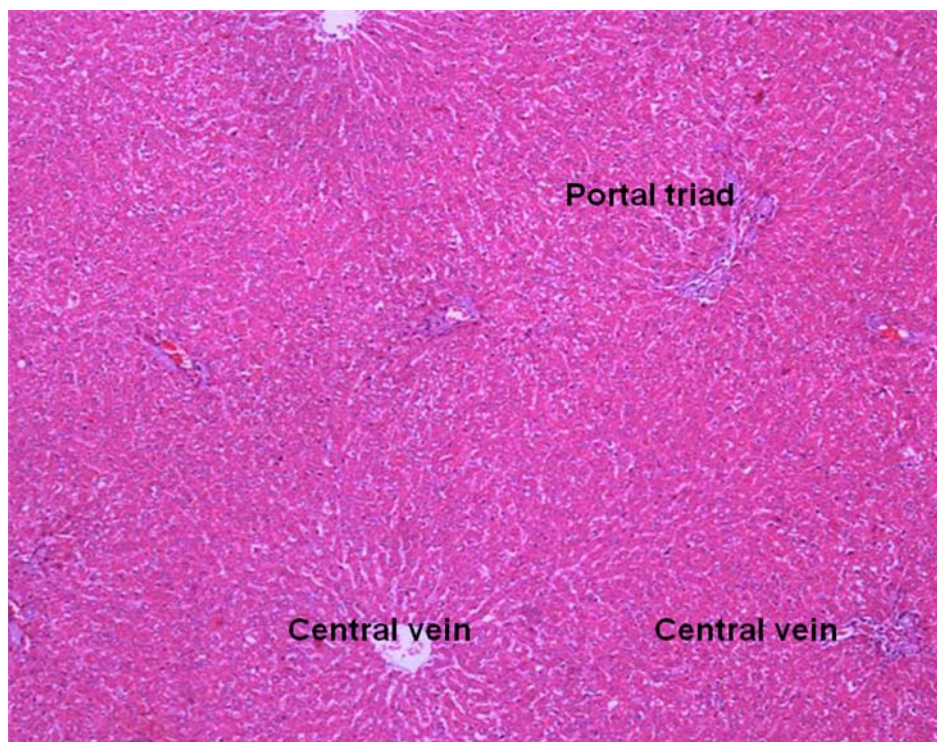

Supplement: Supplementary file 1 [file molecules-17-04326-s001.pdf]
